# Supplementary material for: Richness and distribution of porcupines (Erethizontidae: Coendou) from Colombia
Source: publisher site journal article supplement (doi:10.1515/mammalia-2014-0158), 2015-01-30
Supplement: Supplementary file 1 [file Supp.Material.doc]

**Supplemental material**

**Richness and distribution of porcupines (Erethizontidae: *Coendou*) from Colombia**

Héctor E. Ramírez-Chaves, Andrés Felipe Suárez-Castro, Darwin M. Morales-Martínezand María Camila Vallejo-Pareja

DOI: 10.1515/mammalia-2014-0158

**Supplemental appendix 1** Specimens reviewed.

*Coendou* cf. *bicolor*: Boyacá: Páez, vereda El Tunjo (ICN 123, skull).

*Coendou ichilus*: Meta: Villavicencio, km 30 carretera a Caños Negros (ICN 1772, skin).

*Coendou prehensilis*: Atlántico: Barranquilla (ZSM 1956/199, skull and skeleton; ZSM 1957/167, skin and skull; ZSM 1957/187, skull and skeleton; ZSM 1958/9, skull; ZSM 1958/10, skull; ZSM 1958/20, skin, skull and skeleton; ZSM 1958/76, skull). Boyacá: Pajarito, Corinto (ICN 3033, skull). Cesar, La Jagua de Ibirico, Corregimiento La Victoria, Vereda El Zumbador (ICN 18567, skull; ICN 18568, skull. Cundinamarca: Fusagasugá, 4 km por la carretera a La Aguadita (ICN 443, skull). Magdalena: Santa Marta, Minca, Finca el Recuerdo (ICN uncatalogued, skin, collected by A. Cadena). Meta: Villavicencio, Estación Roberto Franco (ICN 1419, skin); Cubarral, Vereda Aguas Claras (ICN 14932, skull). Norte de Santander: San Cayetano, vereda Tabiro, Finca Hortencia (ICN 21448, skull); Toledo, Sector Rionegro, Parque Nacional Natural Tamá (IAvH 6786, skin and skull). Sucre: Tolú (IAvH 4097, skull). Vichada: Parque Nacional Natural Tuparro (IAvH 3072, skin and skull). No locality data (IAvH 2315, skin and skull).

*Coendou pruinosus*: Guainía: Puerto Inírida, Caño Neuquén (ICN 13939, skull). Norte de Santander: Arboletes (ICN 10980, skin and skull). Vichada: Vichada, corregimiento El Tesoro (IAvH 3963, skull).

*Coendou quichua* (sensu lato): Caldas: Manizales, Fundación Pedro Uribe (ICN 16185 skull). Chocó: Parque Nacional Natural Katios, Salto El Tilupo (IAvH 3083, skin and skull). Santander: San Vicente del Chucurí, Hacienda Trianón (ICN 2015, skin); Puerto Cayunba, Puerto Wilches (UIS 001, skin and skull). No locality data (UIS 027, skull).

*Coendou rufescens*: Caldas: Manizales (ICN 16148, skin). Cauca: El Tambo, Charguayaco (ICN 10041, skin and skull; ICN 10042, skin and skull; ICN 10043, skin and skull). El Tambo, Inspección de Policía Uribe (ICN 10030, skin and skull; ICN 10031, skin and skull; ICN 10032, skin and skull; ICN 10033, skin and skull; ICN 10034, skin and skull; ICN 10035, skin and skull; ICN 10036, skin and skull; ICN 10037, skin and skull; ICN 10038, skin and skull; ICN 10039, skin and skull. El Tambo, Cerro Altamira (ICN 10040, skin). Popayán, Rio Blanco, Las Guacas (MHNUC uncatalogued, skin). Silvia (MHNUC 106E, mounted skin; MHNUC 109E, mounted skin). Sotará, vía a Sotará (MHNUC uncatalogued, PRP 1205, skin). Cundinamarca: Fusagasugá, Carretera 4 km hacia La Aguadita (ICN 443, skin). Meta: Puerto López (ICN 2936, skin). No locality data (MHNUC uncatalogued, skull).

*Coendou vestitus*: Meta, Villavicencio (ICN 3505, skin).

Other evidence:

Photographs of one alive specimens of *C. prehensilis* from Guaviare: San José del Guaviare, Cercanías Laguna La María, taken in February 2013 by Juan Pablo López-Ordoñez were reviewed.

**Supplemental appendix 2** Localities in Figure 4: The localities included specimens reviewed here and confirmed records in Alberico et al. (2000), Voss and Da Silva (2001), and Voss (2011).

*Coendou ichillus*: COLOMBIA: 1. Meta, 30 km in the roadway to Caños Negros (4°9’25”N, 73°33’21”W, 582 m). ECUADOR: 2. Pastaza, Río Conambo (2°7’S, 76°3’W). 3. Rio Pastaza (1°4’S, 78° 0W). PERU: Loreto, Iquitos (3°43’46”S, 73°14’18”W).

*Coendou* *prehensilis*: COLOMBIA: 5. Magdalena, Bonda (11°14’5”N, 74°7’1”W, 60 m). 6. Barranquilla (10°57’50”N, 74°47’49”W, 60 m). 7. Cesar, Villanueva (10°35’9"N, 73°0’49”W, 200 m). 8. Sucre, Tolú (9°3144”N, 75°344”W, 10 m). 9. Cesar, La Jagua de Ibirico, Corregimiento La Victoria, Vereda El Zumbador (9°36’19”N, 73°13’36”W, 220 m). 10. Norte de Santander, San Cayetano, vereda Tabiro, Finca Hortencia (7°51’0”N, 72°36’59”W, 300 m). 11. Toledo, Sector Ríonegro, Parque Nacional Natural Tama (7°9’4"N, 72°13’42”W, 600 m). 12. Cundinamarca, Fusagasugá, 4 km road to La Aguadita (4°23’30”N, 74°19’22”W, 1975 m). 13. Meta, Villavicencio (4°10’0”N, 73°39’0”W, 610 m). 14. Meta, Cubarral, Vereda Aguas Claras (3°48’37”N, 73°52’35”W, 860 m). 15. Vichada, Puerto Carreño (6°12’25”N, 67°29’1”W, 90 m). 16. Vichada, PNN (Natural National Park) Tuparro (5°15’23”N, 68°25’35”W, 100 m). 17. Meta, Los Micos (3°18’40”N, 73°54’17”W, 400 m). 18. Guaviare, San José del Guaviare, Cercanías Laguna La María (2°31’42.26”N, 72°41’27.38”W, 210 m).

*Coendou vestitus*: COLOMBIA: 19. Meta, Villavicencio (4°10’0”N, 73°39’0”W, 610 m). 20. Cundinamarca, Quipile (4°44’50”N, 74°31’59”W, 1250 m). 21. Cundinamarca, San Juan de Rio Seco (4°51’4”N, 74°38’1”W, 1440 m).

*Coendou pruinosus*: COLOMBIA: 22. Meta, Villavicencio (4°8’49”N, 73°37’W). 23. Meta, Pico Rengifo (2°3’N, 73°57’W). 24. Norte de Santander, Alturas de Pamplona (7°22’N, 72°39’W). 25. Norte de Santander: Arboletes (7°38’N, 72°47’W). 27. Guainía: Puerto Inírida, Caño Neuquén (3°51’N, 67°55’W). 26. Vichada, corregimiento El Tesoro, Margen izquierdo del río Guaviare, entre la confluencia del río Guaviare con El Orinoco y la boca del río Inírida (4°2’N, 67°43’W).

*Coendou quichua*: COLOMBIA: 28. Chocó, PNN Katíos, Salto "El Tilupo" (7°48’N, 77°8’W). 29. Caldas, Manizales (5°0’N, 75°30’W). 30. Santander, San Vicente del Chucurí (6°53’N, 73°25’W). 31. Santander, Puerto Wilches, Puerto Cayunba (7°14’N, 73°40’W).

*Coendou* cf. *bicolor*: COLOMBIA:32. Boyacá, Páez (5°4’N, 73°3’W).

*Coendou rufescens*: COLOMBIA: 33. Antioquia, Concordia (6°2’N, 75°54’W).

34. Caldas, Manizales (5°4’N, 75°31’W). 35. Cundinamarca, La Vega (4°59’N, 74°20’W). 36. Cundinamarca, La Aguadita (4°38’N, 74°3’W). 37. Cundinamarca, Chingaza (4°36’N, 73°44’W). 38. Cundinamarca, Choachí (4°31’N, 73°55’W). 39. Cundinamarca, Fómeque (4°29’N, 73°53’W). 40. Cundinamarca, Fusagasugá, road 4 km to La Aguadita (4°20’N, 74°21’W). 41. Cundinamarca, Municipio de Quetame, Quebrada Susumuco, 13 km WNW Villavicencio (4°13’N, 73°45’W). 42. Meta, Puerto López (4°5’N, 72°57’W). 43. Valle del Cauca, San Antonio (4°35’N, 76°53’W). 44. Valle del Cauca, Bolívar (4°20’N, 76°11’W). 45. Valle del Cauca, Buga (3°54’N, 76°17’W). 46. Valle del Cauca, Reserva Natural Hato Viejo (3°19’N, 76°4’W). 47. Cauca, El Tambo, Munchique (2°44’N, 76°46’W). 48. Cauca, EL Tambo, Inspección de Policía Uribe (2°26’N, 76°48’W). 49. Cauca, Charguayaco (2°26’N, 76°48’W). 50. Cauca, Sabanetas (2°32’N, 76°53’W). 51. Cauca, Río Blanco, Las Guacas. 52. Cauca, Quintana (2°N, 76°26’W). 53. Cauca, Silvia (2°36’N, 76°22’W, 2040 m). 54. Cauca, km 46 road to Inzá (2°33’N, 76°3’W). (2°30’2”N, 76°31’46”W). 55. Cauca, Vía a Sotará (2°15’N, 76°36’W).
